# Supplementary material
Source: PubMed Central journal article supplement (PMC10214014)
Supplement: food-84-06-08_s01.pdf [file food-84-06-08_s01.pdf]

## Supplemental Tables

**Supplement Table 1.** Definition of categories for government citations, N=70

| Category                       | %(n)   | Definition                                                                                                                                |
|--------------------------------|--------|-------------------------------------------------------------------------------------------------------------------------------------------|
| Handwashing                    | 7(5)   | The video suggests or describes handwashing including how long, if they recommend soap and how they describe using hand sanitizer.        |
| Survival on surfaces           | 10(7)  | The video suggests how long the virus will survive other surfaces (not food related)                                                      |
| Sanitizing Surfaces            | 17(12) | The video suggests or describes how to sanitize surfaces including high touch surfaces in the kitchen                                     |
| Washing fruits and vegetables  | 14(10) | The video suggests or describes how to wash fruits and vegetables                                                                         |
| Hazardous foods/ food packages | 37(26) | The video implies certain foods or food packages are hazardous or not hazardous                                                           |
| Grocery store practices        | 9(6)   | The video suggests practices to take at grocery stores                                                                                    |
| General Practices              | 6(4)   | The video emphasized on general food safety practices and/or the host/guest suggested to visit the official government agencies' website. |

**Supplement Table 2: General description of selected videos, N=85**

| Video Code | Video title                                                                        | Date Posted | Location | Keywords          |                          |                        | Video author           | Current views | Average rating score by viewers |          |
|------------|------------------------------------------------------------------------------------|-------------|----------|-------------------|--------------------------|------------------------|------------------------|---------------|---------------------------------|----------|
|            |                                                                                    |             |          | Food and COVID-19 | Food safety and COVID-19 | Groceries and COVID-19 |                        |               | Likes                           | Dislikes |
| 1          | PSA Grocery Shopping Tips in COVID-19 (See Important Notes Below) www.DrJeffVW.com | 24-Mar-20   | U.S.     | Yes               | Yes                      | Yes                    | Jeffrey VanWingen      | 26,127,309    | 249,000                         | 7,100    |
| 2          | Coronavirus tips: How to grocery shop safely during COVID-19 pandemic              | 27-Mar-20   | U.S.     | Yes               | Yes                      | Yes                    | syracuse.com           | 845,643       | 3,900                           | 390      |
| 3          | How to properly wipe down your groceries and remove gloves                         | 2-Apr-20    | U.S.     | No                | No                       | Yes                    | CNN                    | 804,638       | 6,600                           | 510      |
| 4          | How to grocery shop during the Coronavirus Pandemic.                               | 4-Apr-20    | U.S.     | No                | No                       | Yes                    | FAIR USE FUNNY         | 510,827       | 9,400                           | 601      |
| 5          | Grocery Shopping Tips in COVID-19 Revised (March 31, 2020) www.DrJeffVW.com        | 1-Apr-20    | U.S.     | Yes               | Yes                      | Yes                    | Jeffrey VanWingen      | 458,654       | 9,400                           | 270      |
| 6          | COVID-19: Should I disinfect my fruits and vegetables?                             | 17-Mar-20   | Canada   | Yes               | No                       | Yes                    | CBC News: The National | 394,728       | 1,900                           | 286      |
| 7          | How to wash fruits & vegetables amid coronavirus pandemic                          | 29-Mar-20   | U.S.     | No                | Yes                      | No                     | Detroit Free Press     | 373,298       | 1,700                           | 1,100    |
| 8          | Will Buffets Ever Regain Popularity After COVID-19?                                | 1-May-20    | U.S.     | Yes               | No                       | No                     | Inside Edition         | 337,801       | 5,600                           | 230      |
| 9          | PSA Package & Delivery Tips for COVID-19   www.DrJeffVW.com                        | 5-Apr-20    | U.S.     | Yes               | Yes                      | No                     | Jeffrey VanWingen      | 237,122       | 9,500                           | 189      |
| 10         | How to safely shop for groceries during COVID-19                                   | 4-May-20    | Canada   | No                | No                       | Yes                    | National Post          | 228,542       | 20                              | 21       |
| 11         | People are more dangerous than food! (COVID-19 food safety tips)                   | 6-Apr-20    | U.S.     | Yes               | Yes                      | No                     | Adam Ragusea           | 212,662       | 7,500                           | 162      |
| 12         | How to handle your groceries during the COVID-19 outbreak                          | 28-Mar-20   | Canada   | No                | Yes                      | Yes                    | CBC News               | 179,113       | 1,000                           | 178      |
| 13         | How To Unpack And Disinfect Your Groceries                                         | 27-Mar-20   | U.S.     | No                | No                       | Yes                    | DoctorOz               | 175,364       | 2,500                           | 89       |
| 14         | How to Safely Buy Groceries During Coronavirus Pandemic                            | 27-Mar-20   | U.S.     | No                | No                       | Yes                    | Inside Edition         | 170,356       | 2,100                           | 122      |
| 15         | Doctors weigh in on people cleaning groceries                                      | 24-Mar-20   | U.S.     | No                | No                       | Yes                    | 41 Action News         | 146,660       | 311                             | 43       |
| 16         | Grocery Shopping Tips - UPDATE (March 31,2020) www.DrJeffVW.com                    | 31-Mar-20   | U.S.     | No                | Yes                      | Yes                    | Jeffrey VanWingen      | 136,495       | 3,600                           | 55       |
| 17         | Can You Get Coronavirus Through Food?                                              | 18-Mar-20   | U.S.     | Yes               | Yes                      | No                     | Mashed                 | 125,220       | 1,400                           | 116      |
| 18         | How to safely grocery shop during the COVID-19 pandemic                            | 8-Apr-20    | Canada   | No                | No                       | Yes                    | CBC News               | 123,947       | 1,000                           | 235      |
| 19         | To clean or not to clean your groceries in the age of coronavirus                  | 6-Apr-20    | U.S.     | No                | No                       | Yes                    | CNET                   | 120,890       | 1,700                           | 73       |
| 20         | COVID-19: Food Safety and Nutrition                                                | 10-Mar-20   | U.S.     | Yes               | Yes                      | No                     | NYU Langone Health     | 114,806       | 415                             | 154      |
| 21         | Safe Grocery Shopping: U of G Expert Dispels Myths                                 | 31-Mar-20   | Canada   | No                | Yes                      | No                     | uofguelph              | 96,337        | N.A.                            | N.A.     |
| 22         | 7 Ways To Keep Your Groceries Clean During Covid-19                                | 21-Apr-20   | U.S.     | No                | No                       | Yes                    | Bestie                 | 79,074        | 1,500                           | 100      |
| 23         | Top 10 grocery safety tips to avoid coronavirus                                    | 11-Apr-20   | U.S.     | No                | Yes                      | Yes                    | AJ+                    | 76,092        | 1,500                           | 145      |

|    |                                                                                                      |           |        |     |     |     |                                   |        |       |      |
|----|------------------------------------------------------------------------------------------------------|-----------|--------|-----|-----|-----|-----------------------------------|--------|-------|------|
| 24 | VERIFY: Microwaving your take-out food does not kill coronavirus                                     | 24-Mar-20 | U.S.   | Yes | No  | No  | KHOU 11                           | 62,284 | 114   | 199  |
| 25 | Safe Use Of Bleach And How To Sanitize Your Groceries During Coronavirus                             | 23-Mar-20 | U.S.   | No  | No  | Yes | Wendy Achatz                      | 59,125 | 576   | 39   |
| 26 | 7 Tips for Healthy Grocery Shopping during COVID-19                                                  | 27-Mar-20 | U.S.   | No  | No  | Yes | Nourishable                       | 52,151 | 419   | 26   |
| 27 | How to Wash Produce during COVID-19 and Beyond                                                       | 1-Apr-20  | U.S.   | No  | Yes | No  | Nourishable                       | 50,687 | 557   | 161  |
| 28 | Can coronavirus (COVID-19) live on groceries? Are they safe to bring home?                           | 26-Mar-20 | U.S.   | No  | Yes | Yes | Click On Detroit                  | 46,219 | 257   | 11   |
| 29 | Safe grocery shopping in the COVID-19 pandemic                                                       | 29-Mar-20 | Canada | No  | No  | Yes | Dr. Dina Kulik                    | 46,016 | 314   | 77   |
| 30 | How To Safely Bring Groceries Into Your Home                                                         | 4-Apr-20  | U.S.   | No  | No  | Yes | Kristina Braly                    | 38,870 | 2,800 | 69   |
| 31 | 10 Ways the Fast Food Industry is AFFECTED by the Coronavirus                                        | 17-Apr-20 | U.S.   | Yes | No  | No  | BabbleTop                         | 36,759 | 652   | 32   |
| 32 | COVID-19: Can Food or Water Carry Coronavirus?                                                       | 16-Mar-20 | U.S.   | Yes | Yes | No  | University Hospitals              | 35,829 | 271   | 50   |
| 33 | 12 Tips for Grocery Shopping During the Pandemic.                                                    | 1-May-20  | U.S.   | No  | Yes | Yes | U.S. Food and Drug Administration | 35,398 | N.A.  | N.A. |
| 34 | DDP talks Food Safety in your home.                                                                  | 29-Mar-20 | U.S.   | Yes | Yes | No  | DDP Yoga                          | 33,038 | 545   | 32   |
| 35 | Food Safety and Coronavirus: A Comprehensive Guide                                                   | 27-Mar-20 | U.S.   | No  | Yes | No  | Serious Eats                      | 30,535 | 745   | 19   |
| 36 | Can an Infected Cook Transmit COVID 19 Through Your Food?                                            | 7-Apr-20  | U.S.   | Yes | No  | No  | DoctorOz                          | 28,478 | 399   | 30   |
| 37 | COVID-19: Can I safely cook or bake food for friends?                                                | 30-Mar-20 | Canada | Yes | No  | No  | CBC News: The National            | 28,083 | 187   | 41   |
| 38 | PSA Covid19: Safe Grocery Shopping with a Grocery Store CEO                                          | 10-Apr-20 | U.S.   | No  | Yes | Yes | Stew Leonard's                    | 25,075 | 193   | 10   |
| 39 | What to eat in isolation   COVID-19 Ask an expert                                                    | 3-Apr-20  | Canada | No  | Yes | No  | CBC News                          | 20,074 | 100   | 40   |
| 40 | Grocery Shopping and COVID-19                                                                        | 3-Apr-20  | U.S.   | No  | No  | Yes | Doctor Stu                        | 23,896 | 11    | 0    |
| 41 | How to safely order takeout and delivery food during coronavirus lockdown   New York Post            | 24-Mar-20 | U.S.   | Yes | Yes | No  | The New York Post                 | 14,698 | 106   | 24   |
| 42 | Doctor Explains How to Safely Bring Home Groceries During Coronavirus Outbreak   NBC10 Philadelphia  | 30-Mar-20 | U.S.   | No  | No  | Yes | NBC10 Philadelphia                | 12,691 | 62    | 2    |
| 43 | What You Need to Know: Food and COVID-19                                                             | 2-Apr-20  | U.S.   | Yes | Yes | No  | U.S. Food and Drug Administration | 12,396 | N.A.  | N.A. |
| 44 | The new normal: how keep clean while handling groceries, deliveries and tech                         | 1-Apr-20  | U.S.   | No  | No  | Yes | ABC News                          | 10,835 | 168   | 14   |
| 45 | Inside America's Food Supply Chain Under Covid-19   Forbes                                           | 22-May-20 | U.S.   | Yes | No  | No  | Forbes                            | 10,753 | 201   | 14   |
| 46 | COVID-19 and food safety                                                                             | 1-Apr-20  | U.S.   | Yes | Yes | No  | Mayo Clinic                       | 10,583 | 69    | 7    |
| 47 | Covid-19 Coronavirus   Buying Groceries Safer Way   How-To BBQ Champion Harry Soo SlapYoDaddyBBQ.com | 29-Mar-20 | U.S.   | No  | Yes | Yes | Harry Soo                         | 8,772  | 322   | 39   |
| 48 | Is food delivery safe during the COVID-19 pandemic?                                                  | 16-Apr-20 | Canada | Yes | Yes | No  | CBC News: The National            | 7,674  | 80    | 27   |

|    |                                                                                                      |           |      |     |     |     |                                              |       |     |    |
|----|------------------------------------------------------------------------------------------------------|-----------|------|-----|-----|-----|----------------------------------------------|-------|-----|----|
| 49 | Is it Safe to Order Food Delivery & Takeout During the COVID-19 Pandemic?                            | 27-Mar-20 | U.S. | Yes | Yes | No  | sciencecomedian                              | 7,213 | 79  | 3  |
| 50 | HOW TO CLEAN YOUR GROCERIES FROM COVID-19   Grocery Shopping Coronavirus Safety    Doctor ER         | 11-Apr-20 | U.S. | No  | No  | Yes | Doctor ER                                    | 7,148 | 139 | 5  |
| 51 | Covid-19 food safety tips   Quarantine Cooking Show                                                  | 2-Apr-20  | U.S. | Yes | Yes | No  | Washington Post                              | 6,881 | 132 | 12 |
| 52 | RV LIVING   INSTACART PUBLIX GROCERY   OUR COVID-19 PANDEMIC CLOROX SANITATION PROCEDURE   EP114     | 19-Apr-20 | U.S. | No  | No  | Yes | Our Journey In Myles                         | 6,499 | 453 | 18 |
| 53 | Coronavirus Update: Latest Grocery Shopping Tips To Stay Safe From COVID-19                          | 30-Mar-20 | U.S. | No  | No  | Yes | CBS New York                                 | 5,904 | 48  | 3  |
| 54 | Food safety expert speaks on coronavirus concerns                                                    | 11-Mar-20 | U.S. | No  | Yes | No  | KTNV Channel 13 Las Vegas                    | 5,716 | 21  | 5  |
| 55 | Is takeout food safe from COVID-19 Coronavirus?                                                      | 17-Mar-20 | U.S. | Yes | Yes | No  | WCNC                                         | 5,290 | 23  | 2  |
| 56 | Best way to sanitize your groceries during COVID-19!                                                 | 17-Apr-20 | U.S. | No  | No  | Yes | Nextgen Digital                              | 5,039 | 111 | 3  |
| 57 | Fresh Produce and COVID19                                                                            | 30-Mar-20 | U.S. | No  | Yes | No  | BACFighter                                   | 4,592 | 25  | 1  |
| 58 | CDC offers tips to be safe from COVID-19 when you shop for groceries                                 | 27-Mar-20 | U.S. | No  | No  | Yes | FOX6 News Milwaukee                          | 4,517 | 30  | 2  |
| 59 | Is it safe to order takeout during COVID-19?                                                         | 31-Mar-20 | U.S. | No  | Yes | No  | 41 Action News                               | 4,347 | 16  | 1  |
| 60 | Disinfect Groceries During COVID-19 Pandemic (How To) #disinfectgroceries                            | 28-Mar-20 | U.S. | No  | No  | Yes | triguytedro                                  | 3,926 | 54  | 4  |
| 61 | Is It Safe To Eat Food From A Drive-Thru? Coronavirus Safety Tips (COVID-19) & Cleaning Credit Cards | 26-Mar-20 | U.S. | No  | Yes | No  | Stan Cravens                                 | 3,442 | 44  | 5  |
| 62 | Food Safety and Coronavirus (COVID-19) Updated 4/14/20                                               | 14-Apr-20 | U.S. | Yes | Yes | No  | Mytonomy                                     | 3,551 | 30  | 0  |
| 63 | Coronavirus Tips - How to Safely Grocery Shop During COVID-19 Pandemic                               | 1-Apr-20  | U.S. | No  | No  | Yes | New Parents in Training                      | 3,367 | 60  | 5  |
| 64 | Disinfect Groceries with Hydrogen Peroxide from Coronavirus COVID-19 With Me                         | 7-Apr-20  | U.S. | No  | No  | Yes | QualityDaydreams                             | 3,220 | 61  | 6  |
| 65 | TUBEREATS 🍷 Delivering food to friends during Covid19 quarantine #supportlocal                       | 19-May-20 | U.S. | Yes | No  | No  | Fancy Nancy TV                               | 3,124 | 212 | 4  |
| 66 | Is food delivery safe? Does cooking kill the coronavirus? An expert answers commonly asked questions | 13-Apr-20 | U.S. | No  | Yes | No  | ABC7                                         | 3,306 | 31  | 5  |
| 67 | Food Safety and Grocery Shopping Tips during COVID-19                                                | 6-Apr-20  | U.S. | No  | Yes | Yes | A Healthier Michigan                         | 2,867 | 25  | 2  |
| 68 | How to Safely Grocery Shop During COVID-19 Outbreak                                                  | 14-Apr-20 | U.S. | No  | No  | Yes | DrTanya                                      | 2,855 | 62  | 0  |
| 69 | COVID-19 impacting food truck business in Baltimore                                                  | 20-Mar-20 | U.S. | Yes | No  | No  | WMAR-2 News                                  | 1,871 | 21  | 0  |
| 70 | Can cooks spread coronavirus (COVID-19) by talking, breathing near prepared food?                    | 10-Apr-20 | U.S. | Yes | No  | No  | Click on Detroit Local 4 WDIV                | 1,569 | 19  | 2  |
| 71 | Food Security Throughout the COVID-19 Pandemic                                                       | 24-Mar-20 | U.S. | Yes | No  | No  | Center for Strategic & International Studies | 1,514 | 26  | 2  |
| 72 | Does Cooking & Freezing Food Affect the Coronavirus?                                                 | 1-Apr-20  | U.S. | No  | Yes | No  | sciencecomedian                              | 1,442 | 17  | 0  |

|    |                                                                                                   |           |      |     |     |     |                                        |       |     |   |
|----|---------------------------------------------------------------------------------------------------|-----------|------|-----|-----|-----|----------------------------------------|-------|-----|---|
| 73 | How To Clean & Sanitize your groceries properly during the Covid 19 outbreak sanitize groceries   | 13-Apr-20 | U.S. | No  | No  | Yes | Made By Meenal                         | 1,411 | 122 | 1 |
| 74 | Covid-19   Can Groceries Spread the Virus?                                                        | 21-Apr-20 | U.S. | No  | No  | Yes | Clean Freak & Germophobe               | 1,395 | 41  | 2 |
| 75 | Food Safety During the COVID-19 Outbreak                                                          | 7-Apr-20  | U.S. | Yes | Yes | No  | Ohio State News                        | 1,366 | 10  | 0 |
| 76 | How to Disinfect Costco Groceries w/ DIY Hydrogen Peroxide Disinfectant Spray to Kill Coronavirus | 22-Apr-20 | U.S. | No  | No  | Yes | QualityDaydreams                       | 1,263 | 25  | 3 |
| 77 | Coronavirus: Shoes off when you enter the house? Is takeout food safe? Answering health questions | 30-Mar-20 | U.S. | No  | Yes | No  | ABC10                                  | 1,262 | 12  | 2 |
| 78 | How to wash fruits & vegetables amid coronavirus pandemic #COVID19#FoodSafety#Awareness           | 11-Apr-20 | U.S. | No  | Yes | No  | Laxmi Raghunadh                        | 1,122 | 25  | 0 |
| 79 | Is grocery store food, take-out food safe to eat?                                                 | 9-Apr-20  | U.S. | No  | Yes | No  | KSAT 12                                | 1,066 | 9   | 0 |
| 80 | COVID-19   30 Tips for Grocery Shopping Safely during Coronavirus Pandemic                        | 4-Apr-20  | U.S. | No  | No  | Yes | Alex goes Coconuts                     | 851   | 31  | 2 |
| 81 | Ways to Stay Healthy While at the Grocery Store                                                   | 18-Mar-20 | U.S. | No  | Yes | No  | MissStateExtension                     | 783   | 7   | 0 |
| 82 | Coronavirus food safety tips for takeout and delivery                                             | 26-Mar-20 | U.S. | No  | Yes | No  | KOAT                                   | 780   | 2   | 3 |
| 83 | Covid-19 & Food Safety: How to Wash Your Produce                                                  | 26-Mar-20 | U.S. | No  | Yes | No  | Kaplan Center for Integrative Medicine | 758   | 7   | 0 |
| 84 | Coronavirus, Food Packaging, and Ways to Prevent the Spread of COVID-19                           | 27-Mar-20 | U.S. | No  | Yes | No  | FMI                                    | 709   | 4   | 0 |
| 85 | More than 800 cases of COVID-19 at 19 NC food and meat processing plants                          | 11-May-20 | U.S. | Yes | No  | No  | WLOS News 13                           | 538   | 5   | 2 |

**Supplement Table 3. Procedures and Practices considered for take-out food and grocery shopping, N=59**

| Video code | Video Title                                                                                                              | Take-out                                                                  | Grocery stores                                                                                                                                                                                                                                                                                                                 |
|------------|--------------------------------------------------------------------------------------------------------------------------|---------------------------------------------------------------------------|--------------------------------------------------------------------------------------------------------------------------------------------------------------------------------------------------------------------------------------------------------------------------------------------------------------------------------|
| 1          | PSA Grocery Shopping Tips in COVID-19 (See Important Notes Below) <a href="http://www.DrJeffVW.com">www.DrJeffVW.com</a> | (1) Change container<br>(2) Heat the food on the microwave                | (1) Wipe down your cart (2) Commit to what you are buying (3) Do not shop if you have respiratory symptoms or have been exposed (4) Do not allow elderly to go grocery shopping (5) Plan what you will buy for 2 weeks                                                                                                         |
| 2          | Coronavirus tips: How to grocery shop safely during COVID-19 pandemic                                                    | N.A. <sup>a</sup>                                                         | (1) Go when it is not crowded (2) Bring sanitizing wipes with you. Use them to wipe your cart and your hands (3) Gloves not needed (4) Use wipes to open freezer doors (5) Keep social distance (6) Wait your turn at the register (7) Try virtual payment (8) Sanitize your hands and your phone as soon as you reach the car |
| 3          | How to properly wipe down your groceries and remove gloves                                                               | (1) Ask to leave the take-out outside                                     | (1) Limit the number of times going to the grocery store                                                                                                                                                                                                                                                                       |
| 4          | How to grocery shop during the Coronavirus Pandemic.                                                                     | N.A.                                                                      | (1) Wipe down cart (2) Make a list ahead of time (3) Go alone (4) Do not touch what you do not need (5) Social distance (6) Move safely and briskly through the store (7) Move items so UPC codes face up (quick checkout) (8) Leave receipt behind if you do not need it                                                      |
| 5          | Grocery Shopping Tips in COVID-19 Revised (March 31, 2020) <a href="http://www.DrJeffVW.com">www.DrJeffVW.com</a>        | N.A.                                                                      | (1) Use delivery service. (2) Only go when necessary. (3) Send younger family members. (4) Pay with plastic. (5) Get up to 2 weeks of groceries. (6) Make a plan and a list. (7) Commit to buy. (8) Do not go to the store if experiencing respiratory illness symptoms.                                                       |
| 6          | COVID-19: Should I disinfect my fruits and vegetables?                                                                   | (1) Take your food out of the bag and practice hand hygiene               | (1) Commit to buy what you touch.                                                                                                                                                                                                                                                                                              |
| 9          | PSA Package & Delivery Tips for COVID-19   <a href="http://www.DrJeffVW.com">www.DrJeffVW.com</a>                        | (1) Change container                                                      | N.A.                                                                                                                                                                                                                                                                                                                           |
| 10         | How to safely shop for groceries during COVID-19                                                                         | N.A.                                                                      | (1) Shop once a week (2) Plan ahead (3) Do not linger in the aisles (4) Do not touch groceries you will not buy (5) Stay 6ft away (6) Wear a mask (7) Wipe cart and basket down                                                                                                                                                |
| 11         | People are more dangerous than food! (COVID-19 food safety tips)                                                         | (1) Change container<br>(2) Wash hands with soap and water for 20 seconds | (1) Do grocery delivery instead of shopping in store                                                                                                                                                                                                                                                                           |
| 12         | How to handle your groceries during the COVID-19 outbreak                                                                | N.A.                                                                      | (2) Stay 2 meters away from others                                                                                                                                                                                                                                                                                             |
| 13         | How To Unpack And Disinfect Your Groceries                                                                               | N.A.                                                                      | (1) Ask for double bagging                                                                                                                                                                                                                                                                                                     |
| 14         | How to Safely Buy Groceries During Coronavirus Pandemic                                                                  | N.A.                                                                      | (1) Wipe down cart (2) Maintain 6ft away (3) Pay with your phone or use credit card                                                                                                                                                                                                                                            |

|    |                                                                          |                                                                                                    |                                                                                                                                                                                                                                                  |
|----|--------------------------------------------------------------------------|----------------------------------------------------------------------------------------------------|--------------------------------------------------------------------------------------------------------------------------------------------------------------------------------------------------------------------------------------------------|
| 17 | Can You Get Coronavirus Through Food?                                    | N.A.                                                                                               | (1) Social distance (2) Take advantage of wipes and hand sanitizer                                                                                                                                                                               |
| 18 | How to safely grocery shop during the COVID-19 pandemic                  | N.A.                                                                                               | (1) Make a shopping list (2) Go alone (3) Physical distance - 2 meters (4) Go at off peak hours (5) Wipe down the cart handle (6) Do not touch your face (7) Only touch what you are going to buy (8) Pay with card tap                          |
| 19 | To clean or not to clean your groceries in the age of coronavirus        | (1) Stay 6ft away when picking up<br>(2) Pay via app or phone (3) Change containers and dispose it | (1) Minimize time at the store, go shopping every two weeks (2) Wipe down the cart (3) Plan ahead and touch items you intend to buy (4) Consider switching to paper list (5) Self-checkout (6) Contactless payment                               |
| 21 | Safe Grocery Shopping: U of G Expert Dispels Myths                       | N.A.                                                                                               | (1) Make a list of food items to minimize time in store (2) Go to a store that are following precautions (3) Disinfect handles of shopping carts (4) Practice social distancing (5) Use disinfectant wipe to clean hands after leaving the store |
| 22 | 7 Ways To Keep Your Groceries Clean During Covid-19                      | N.A.                                                                                               | (1) Use airtight containers when shopping (2) Wear washable gloves (3) Go cashless and card-less;                                                                                                                                                |
| 23 | Top 10 grocery safety tips to avoid coronavirus                          | N.A.                                                                                               | (1) Do not shop too often (2) Avoid peak hours (3) Wipe down the cart (4) Do not touch your face (5) Social distance (6) No need to bring your own bags                                                                                          |
| 24 | VERIFY: Microwaving your take-out food does not kill coronavirus         | (1) Microwaving will not kill the virus on take-out food                                           | N.A.                                                                                                                                                                                                                                             |
| 25 | Safe Use Of Bleach And How To Sanitize Your Groceries During Coronavirus | N.A.                                                                                               | (1) Sanitize groceries (e.g. canned goods, plastic container) for elderly people after shopping                                                                                                                                                  |
| 26 | 7 Tips for Healthy Grocery Shopping during COVID-19                      | N.A.                                                                                               | (1) Make a plan - 2 weeks' worth of meals (2) Write list on a paper (3) Use wipes on cart (4) Do not touch the face (5) Social distance - 6ft away (6) Stock, but do not hoard (7) Commit to what you touch                                      |
| 27 | How to Wash Produce during COVID-19 and Beyond                           | N.A.                                                                                               | (1) Go grocery shopping every two weeks (2) Use wipes and hand sanitizer (3) Keep 6ft away from people (4) Be quick and efficient                                                                                                                |
| 29 | Safe grocery shopping in the COVID-19 pandemic                           | N.A.                                                                                               | (1) Shop less frequently                                                                                                                                                                                                                         |
| 31 | 10 Ways the Fast Food Industry is AFFECTED by the Coronavirus            | (1) Heat the food on the microwave                                                                 | N.A.                                                                                                                                                                                                                                             |
| 33 | 12 Tips for Grocery Shopping During the Pandemic.                        | N.A.                                                                                               | (1) Check for shopping hours (2) Make a list (3) Buy one to two weeks of groceries at a time (4) Wear a face mask (5) Social distance (6) Use wipes to wipe down cart or basket (7) Wash reusable bags                                           |
| 34 | DDP talks Food Safety in your home.                                      | (1) Get hot food or put it in the microwave                                                        | (1) If over 60 years old, should not go to the grocery store                                                                                                                                                                                     |

|    |                                                                                                      |                                                         |                                                                                                                                                                                                                                                                                                     |
|----|------------------------------------------------------------------------------------------------------|---------------------------------------------------------|-----------------------------------------------------------------------------------------------------------------------------------------------------------------------------------------------------------------------------------------------------------------------------------------------------|
| 35 | Food Safety and Coronavirus: A Comprehensive Guide                                                   | (1) Heat food to 149F/ 65C for 3 minutes                | (1) Use the self-checkout lane (2) Use cash-free or card-less payment (3) Shop at small grocery stores (4) Go at off peak hours                                                                                                                                                                     |
| 36 | Can an Infected Cook Transmit COVID 19 Through Your Food?                                            | (1) Change container (2) Reheat in the microwave        | N.A.                                                                                                                                                                                                                                                                                                |
| 38 | PSA Covid19: Safe Grocery Shopping with a Grocery Store CEO                                          | N.A.                                                    | (1) Try not to go when it's busy (2) Keep 6 ft away from people (3) Wear gloves and wear a mask (4) Wipe credit card down (5) Use Apple pay (6) Wipe down reusable bags if you used them (7) Do not touch your face;                                                                                |
| 39 | What to eat in isolation   COVID-19 Ask an expert                                                    | (1) Change container and dispose it                     | (1) Use plastic bags, not reusable bags                                                                                                                                                                                                                                                             |
| 40 | Grocery Shopping and COVID-19                                                                        | N.A.                                                    | (1) Shop for 10 days to 2 weeks                                                                                                                                                                                                                                                                     |
| 41 | How to safely order takeout and delivery food during coronavirus lockdown   New York Post            | (1) Wipe the container (2) Wash hands                   | N.A.                                                                                                                                                                                                                                                                                                |
| 42 | Doctor Explains How to Safely Bring Home Groceries During Coronavirus Outbreak   NBC10 Philadelphia  | N.A.                                                    | (1) Use plastic bags                                                                                                                                                                                                                                                                                |
| 44 | The new normal: how keep clean while handling groceries, deliveries and tech                         | (1) Change container                                    | (1) Careful to be in contact with people                                                                                                                                                                                                                                                            |
| 45 | Inside America's Food Supply Chain Under Covid-19   Forbes                                           | N.A.                                                    | (1) Social distancing (2) Specific hours for elderly (3) Limit number of shoppers in store                                                                                                                                                                                                          |
| 47 | Covid-19 Coronavirus   Buying Groceries Safer Way   How-To BBQ Champion Harry Soo SlapYoDaddyBBQ.com | N.A.                                                    | (1) Wear mask and gloves (2) Go to the grocery when it is less crowded (3) Use self-checkout (4) Stay at least 10ft away from people (5) Wipe down wallet, credit cards, and phone (6) Going to the store once a week;                                                                              |
| 48 | Is food delivery safe during the COVID-19 pandemic?                                                  | (1) Change container (2) Wash hands with soap and water | N.A.                                                                                                                                                                                                                                                                                                |
| 49 | Is it Safe to Order Food Delivery & Takeout During the COVID-19 Pandemic?                            | (1) Wash hands                                          | N.A.                                                                                                                                                                                                                                                                                                |
| 50 | HOW TO CLEAN YOUR GROCERIES FROM COVID-19   Grocery Shopping Coronavirus Safety    Doctor ER         | N.A.                                                    | (1) Plan ahead, get more than you need on a list (2) Sending the healthiest person to the store; one person (3) Do not go if you are sick (4) Wear a mask; optional gloves (5) Pay with a credit card (6) Give as much distance as you can (7) Do not touch items if you are going to put them back |



|    |                                                                                                      |                                                                               |                                                                                                                                                                                                                                                                           |
|----|------------------------------------------------------------------------------------------------------|-------------------------------------------------------------------------------|---------------------------------------------------------------------------------------------------------------------------------------------------------------------------------------------------------------------------------------------------------------------------|
| 51 | Covid-19 food safety tips   Quarantine Cooking Show                                                  | (1) Change container<br>(2) Wash hands<br>N.A.                                | (1) Keeping 6 ft away from people (2) Do not touch your face, if gloves help you to remember wear them (3) Go to the store alone (4) Touch only the things you plan to add to your cart (5) Go as infrequently as possible (6) Try to have a couple weeks of food at hand |
| 53 | Coronavirus Update: Latest Grocery Shopping Tips To Stay Safe From COVID-19                          | N.A.                                                                          | (1) Stay 6 ft away (2) Wipe down the cart (3) Use paper shopping list (4) Avoid touching your face and your phone (5) Avoid paying with cash, use credit card                                                                                                             |
| 55 | Is takeout food safe from COVID-19 Coronavirus?                                                      | (1) Clean containers<br>(2) Wash hands<br>N.A.                                | N.A.                                                                                                                                                                                                                                                                      |
| 56 | Best way to sanitize your groceries during COVID-19!                                                 | N.A.                                                                          | (1) Wear a mask (2) Go to the store alone (3) Sanitize the cart handle (4) Avoid touching your face (5) Wear gloves when going to the store (6) Stay 6ft away (7) Use contactless pay or credit card                                                                      |
| 58 | CDC offers tips to be safe from COVID-19 when you shop for groceries                                 | N.A.                                                                          | (1) Maintain social distancing (2) Limit time in the store; two trips a week (3) Make a list                                                                                                                                                                              |
| 59 | Is it safe to order takeout during COVID-19?                                                         | (1) Wipe down hard containers<br>(2) Change container                         | N.A.                                                                                                                                                                                                                                                                      |
| 61 | Is It Safe To Eat Food From A Drive-Thru? Coronavirus Safety Tips (COVID-19) & Cleaning Credit Cards | (1) Change container and dispose it                                           | N.A.                                                                                                                                                                                                                                                                      |
| 62 | Food Safety and Coronavirus (COVID-19) Updated 4/14/20                                               | (1) Stick with cooked food and reheat well<br>(2) Change container            | 1. Buy at least 2 weeks of groceries at a time; 2. Get groceries delivered; 3. Try to go early to avoid crowds; especially if elderly or have high risk condition; 4. Stay 6ft away; two shopping carts away; 5. Don't touch face; wear a mask; 6. Use hand san           |
| 63 | Coronavirus Tips - How to Safely Grocery Shop During COVID-19 Pandemic                               | N.A.                                                                          | (1) Go to the grocery store when it opens (2) Bring wipes to wipe down cart (3) Wear a mask (4) Have a list ready (5) Buy what you grab                                                                                                                                   |
| 66 | Is food delivery safe? Does cooking kill the coronavirus? An expert answers commonly asked questions | (1) Wipe container<br>(2) Change container                                    | (1) Go at off peak hours (2) Wipe down the cart (3) Go as fast as you can (4) Pay with a credit card (5) Use the pen to push the buttons (6) Wash cloth reusable bags in hot and soapy water (7) Spray plastic reusable bags with disinfecting spray, let it air dry      |
| 67 | Food Safety and Grocery Shopping Tips during COVID-19                                                | (1) Change container and dispose it (2) Use own silverware<br>(3) Reheat food | (1) Use a sanitizing wipe to clean your cart handles (2) Commit to buying items before picking them up (3) Pay with a card instead of cash (4) Sanitize after checkout                                                                                                    |
| 68 | How to Safely Grocery Shop During COVID-19 Outbreak                                                  | N.A.                                                                          | (1) Make a grocery list (2) Go not at a peak time (3) Wear a mask and gloves (4) Keep credit card and phone in a bag (5) Wipe down the cart (6) Only touch what you will buy                                                                                              |

|    |                                                                                                   |                                                                                       |                                                                                                                                                                                                                                                                                                                                          |
|----|---------------------------------------------------------------------------------------------------|---------------------------------------------------------------------------------------|------------------------------------------------------------------------------------------------------------------------------------------------------------------------------------------------------------------------------------------------------------------------------------------------------------------------------------------|
| 71 | Food Security Throughout the COVID-19 Pandemic                                                    | N.A.                                                                                  | (1) Keep other shoppers in mind (only buy what you need), if item is out try again in few days                                                                                                                                                                                                                                           |
| 74 | Covid-19   Can Groceries Spread the Virus?                                                        | N.A.                                                                                  | (1) Have no direct handoff (2) Maintain 6ft away (3) Wear a mask (4) Do not bring people, go alone (5) Do not go if you have symptoms (6) Use wipe to clean cart (7) Go shopping when it is not busy (8) Do not touch your face (9) Use credit card or virtual pay                                                                       |
| 75 | Food Safety During the COVID-19 Outbreak                                                          | (1) Deliver food                                                                      | (1) Wash your hands before going grocery shopping (2) Wipe the grocery cart handle; is a high touch surface (3) Separate raw meat from ready to eat foods (4) Keep social distancing (5) Go for self-checkout (6) Use credit card instead of card                                                                                        |
| 77 | Coronavirus: Shoes off when you enter the house? Is takeout food safe? Answering health questions | (1) Wipe down                                                                         | N.A.                                                                                                                                                                                                                                                                                                                                     |
| 79 | Is grocery store food, take-out food safe to eat?                                                 | (1) Change container and dispose it (2) Wipe down package (3) Reheat in the microwave | N.A.                                                                                                                                                                                                                                                                                                                                     |
| 80 | COVID-19   30 Tips for Grocery Shopping Safely during Coronavirus Pandemic                        | N.A.                                                                                  | (1) Write down a list (2) Go to the grocery store that you are familiar (3) Bring your own hand sanitizer (4) Wipe down the handle of cart (5) Bring your own grocery bags (6) Make items accessible (7) Pay with credit card (8) Maintain 6ft away (9) Stick to food that can be cooked, peeled, or washed (10) Pack your own groceries |
| 81 | Ways to Stay Healthy While at the Grocery Store                                                   | N.A.                                                                                  | (1) Use sanitizing wipe to wipe down all surfaces that can come into contact with food and hands (2) Touch or pick up products you intend to purchase (3) Shop at off peak hours;                                                                                                                                                        |
| 82 | Coronavirus food safety tips for takeout and delivery                                             | (1) Leave food at doorstep (2) Wash hands (3) Change container                        | N.A.                                                                                                                                                                                                                                                                                                                                     |

<sup>a</sup> Not applicable

**Supplement Table 4. Profession of hosts and guests, N=51**

| Video code | Video title                                                                                         | Video author                                | Host                                 |                               | Guest                   |                  |
|------------|-----------------------------------------------------------------------------------------------------|---------------------------------------------|--------------------------------------|-------------------------------|-------------------------|------------------|
|            |                                                                                                     |                                             | Healthcare Professional <sup>a</sup> | Professor/Expert <sup>b</sup> | Healthcare professional | Professor/Expert |
| 1          | PSA Grocery Shopping Tips in COVID-19 (See Important Notes Below) www.DrJeffVW.com                  | Jeffrey VanWingen                           | 1                                    | NA <sup>c</sup>               | NA                      | N.A.             |
| 5          | Grocery Shopping Tips in COVID-19 Revised (March 31, 2020) www.DrJeffVW.com                         | Jeffrey VanWingen<br>CBC News: The National | 1                                    | NA                            | NA                      | 1                |
| 6          | COVID-19: Should I disinfect my fruits and vegetables?                                              |                                             | NA                                   | NA                            | 2                       | NA               |
| 8          | Will Buffets Ever Regain Popularity After COVID-19?                                                 | Inside Edition                              | NA                                   | NA                            | NA                      | 1                |
| 9          | PSA Package & Delivery Tips for COVID-19   www.DrJeffVW.com                                         | Jeffrey VanWingen                           | 1                                    | NA                            | NA                      | NA               |
| 11         | People are more dangerous than food! (COVID-19 food safety tips)                                    | Adam Ragusea                                | NA                                   | NA                            | NA                      | 2                |
| 13         | How To Unpack And Disinfect Your Groceries                                                          | DoctorOz                                    | 1                                    | NA                            | NA                      | NA               |
| 14         | How to Safely Buy Groceries During Coronavirus Pandemic                                             | Inside Edition                              | NA                                   | NA                            | NA                      | 1                |
| 15         | Doctors weigh in on people cleaning groceries                                                       | 41 Action News                              |                                      |                               |                         |                  |
| 16         | Grocery Shopping Tips - UPDATE (March 31,2020) www.DrJeffVW.com                                     | Jeffrey VanWingen                           | 1                                    | NA                            | NA                      | NA               |
| 19         | To clean or not to clean your groceries in the age of coronavirus                                   | CNET                                        |                                      |                               |                         |                  |
| 20         | COVID-19: Food Safety and Nutrition                                                                 | NYU Langone Health                          | 1                                    | NA                            | 1                       | 1                |
| 21         | Safe Grocery Shopping: U of G Expert Dispels Myths                                                  | uofguelph                                   | NA                                   | 1                             | NA                      | NA               |
| 23         | Top 10 grocery safety tips to avoid coronavirus                                                     | AJ+<br>Nourishable                          | NA                                   | NA                            | NA                      | 1                |
| 26         | 7 Tips for Healthy Grocery Shopping during COVID-19                                                 | Nourishable                                 | NA                                   | 1                             | NA                      | NA               |
| 27         | How to Wash Produce during COVID-19 and Beyond                                                      |                                             | NA                                   | 1                             | NA                      | NA               |
| 28         | Can coronavirus (COVID-19) live on groceries? Are they safe to bring home?                          | Click On Detroit                            | NA                                   | NA                            | 1                       | NA               |
| 29         | Safe grocery shopping in the COVID-19 pandemic                                                      | Dr. Dina Kulik                              | 1                                    |                               |                         |                  |
| 30         | How To Safely Bring Groceries Into Your Home                                                        | Kristina Braly                              | 1                                    | NA                            | NA                      | NA               |
| 32         | COVID-19: Can Food or Water Carry Coronavirus?                                                      | University Hospitals                        | 1                                    | NA                            | NA                      | NA               |
| 35         | Food Safety and Coronavirus: A Comprehensive Guide                                                  | Serious Eats                                | NA                                   | NA                            | NA                      | 1                |
| 36         | Can an Infected Cook Transmit COVID 19 Through Your Food?                                           | DoctorOz                                    | 1                                    | NA                            | NA                      | NA               |
| 37         | COVID-19: Can I safely cook or bake food for friends?                                               | CBC News: The National<br>CBC News          | NA                                   | NA                            | NA                      | 1                |
| 39         | What to eat in isolation   COVID-19 Ask an expert                                                   |                                             | NA                                   | NA                            | 1                       | NA               |
| 40         | Grocery Shopping and COVID-19                                                                       | Doctor Stu                                  | 1                                    | NA                            | NA                      | NA               |
| 41         | How to safely order takeout and delivery food during coronavirus lockdown   New York Post           | The New York Post                           | NA                                   | NA                            | NA                      | 1                |
| 42         | Doctor Explains How to Safely Bring Home Groceries During Coronavirus Outbreak   NBC10 Philadelphia | NBC10 Philadelphia                          | NA                                   | NA                            | 1                       | NA               |

|    |                                                                                                      | U.S. Food and Drug Administration            |    |    |    |    |
|----|------------------------------------------------------------------------------------------------------|----------------------------------------------|----|----|----|----|
| 43 | What You Need to Know: Food and COVID-19                                                             |                                              | NA | 1  | NA | NA |
| 44 | The new normal: how keep clean while handling groceries, deliveries and tech                         | ABC News                                     | NA |    | NA | 1  |
| 46 | COVID-19 and food safety                                                                             | Mayo Clinic                                  | 1  | NA | NA | NA |
| 47 | Covid-19 Coronavirus   Buying Groceries Safer Way   How-To BBQ Champion Harry Soo                    | Harry Soo                                    | NA | NA | NA | 1  |
| 48 | Is food delivery safe during the COVID-19 pandemic?                                                  | CBC News: The National                       | NA | NA | NA | 2  |
| 49 | Is it Safe to Order Food Delivery & Takeout During the COVID-19 Pandemic?                            | sciencecomedian                              | NA | NA | NA | 1  |
| 50 | HOW TO CLEAN YOUR GROCERIES FROM COVID-19   Grocery Shopping Coronavirus Safety    Doctor ER         | Doctor ER                                    | 1  | NA | NA | NA |
| 53 | Coronavirus Update: Latest Grocery Shopping Tips To Stay Safe From COVID-19                          | CBS New York                                 | NA | NA | NA | 1  |
| 54 | Food safety expert speaks on coronavirus concerns                                                    | KTNV Channel 13 Las Vegas                    | NA | NA | NA |    |
| 57 | Fresh Produce and COVID19                                                                            | BACFighter                                   | NA | 1  | NA | NA |
| 59 | Is it safe to order takeout during COVID-19?                                                         | 41 Action News                               | NA | NA | 1  | NA |
| 60 | Disinfect Groceries During COVID-19 Pandemic (How To) #disinfectgroceries                            | triguytedro                                  | NA | 1  | NA | NA |
| 66 | Is food delivery safe? Does cooking kill the coronavirus? An expert answers commonly asked questions | ABC7                                         | NA | NA | NA | 1  |
| 68 | How to Safely Grocery Shop During COVID-19 Outbreak                                                  | Dr. Tanya                                    | 1  | NA | NA | NA |
| 70 | Can cooks spread coronavirus (COVID-19) by talking, breathing near prepared food?                    | Click on Detroit Local 4 WDIV                | NA | NA | 1  | NA |
| 71 | Food Security Throughout the COVID-19 Pandemic                                                       | Center for Strategic & International Studies | NA | 1  | NA | NA |
| 72 | Does Cooking & Freezing Food Affect the Coronavirus?                                                 | sciencecomedian                              | NA | NA | NA | 1  |
| 74 | Covid-19   Can Groceries Spread the Virus?                                                           | Clean Freak & Germophobe                     | 1  | NA | NA | NA |
| 75 | Food Safety During the COVID-19 Outbreak                                                             | Ohio State News                              | NA | 1  | NA | NA |
| 77 | Coronavirus: Shoes off when you enter the house? Is takeout food safe? Answering health questions    | ABC10                                        | NA | NA | 1  | NA |
| 79 | Is grocery store food, take-out food safe to eat?                                                    | KSAT 12                                      | NA | NA | NA | 1  |
| 81 | Ways to Stay Healthy While at the Grocery Store                                                      | MissStateExtension                           | NA | 1  | NA | 1  |
| 83 | Covid-19 & Food Safety: How to Wash Your Produce                                                     | Kaplan Center for Integrative Medicine       | 1  | NA | NA | NA |
| 84 | Coronavirus, Food Packaging, and Ways to Prevent the Spread of COVID-19                              | FMI                                          | NA | 1  | NA | NA |

<sup>a</sup> Healthcare professional refers to physicians, nurses, dietitians, and those in any related profession.

<sup>b</sup> Professor/Expert refers to a virologist, epidemiologist, microbiologist, or food safety experts.

<sup>c</sup> Not applicable

**Supplement Table 5.** Procedures and Government Agencies citations, N=70

| Video code | Video Title                                                                                                              | Total number of Government Agencies citations | Government Agencies (abbreviate name) | Category                      | Any Miscitation <sup>a</sup> | Miscitations <sup>b</sup>                                            | Why was this a miscitation?                                                                                                                                  | Interpretation or feedback of the citation                                                     | Reference |
|------------|--------------------------------------------------------------------------------------------------------------------------|-----------------------------------------------|---------------------------------------|-------------------------------|------------------------------|----------------------------------------------------------------------|--------------------------------------------------------------------------------------------------------------------------------------------------------------|------------------------------------------------------------------------------------------------|-----------|
|            |                                                                                                                          |                                               | NIH                                   | Survival on Surfaces          | No                           | N.A. <sup>c</sup>                                                    | N.A.                                                                                                                                                         | N.A.                                                                                           | 10        |
| 1          | PSA Grocery Shopping Tips in COVID-19 (See Important Notes Below) <a href="http://www.DrJeffVW.com">www.DrJeffVW.com</a> | 5                                             | NIH                                   | Hazardous Food/food packages  | Yes                          | "Following the logic, keep groceries on garage or porch for 3 days." | Although the NIH reported that the virus can live on surfaces for up to 3 days, it was never suggested to leave groceries in the garage or porch for 3 days. | N.A.                                                                                           | 10        |
|            |                                                                                                                          |                                               | CDC                                   | Survival on Surfaces          | No                           | N.A.                                                                 | N.A.                                                                                                                                                         | N.A.                                                                                           | 5         |
|            |                                                                                                                          |                                               | CDC                                   | Sanitizing Surfaces           | No                           | N.A.                                                                 | N.A.                                                                                                                                                         | N.A.                                                                                           | 3         |
|            |                                                                                                                          |                                               | CDC                                   | Handwashing                   | No                           | N.A.                                                                 | N.A.                                                                                                                                                         | N.A.                                                                                           | 4         |
| 2          | Coronavirus tips: How to grocery shop safely during COVID-19 pandemic                                                    | 1                                             | USDA                                  | Washing fruits and vegetables | No                           | N.A.                                                                 | N.A.                                                                                                                                                         | N.A.                                                                                           | 13        |
| 5          | Grocery Shopping Tips in COVID-19 Revised (March 31, 2020) <a href="http://www.DrJeffVW.com">www.DrJeffVW.com</a>        | 2                                             | NIH                                   | Survival on Surfaces          | No                           | N.A.                                                                 | N.A.                                                                                                                                                         | N.A.                                                                                           | 10        |
|            |                                                                                                                          |                                               | CDC                                   | Sanitizing Surfaces           | No                           | N.A.                                                                 | N.A.                                                                                                                                                         | N.A.                                                                                           | 3         |
| 7          | How to wash fruits & vegetables amid coronavirus pandemic                                                                | 1                                             | FDA                                   | Washing fruits and vegetables | No                           | N.A.                                                                 | N.A.                                                                                                                                                         | N.A.                                                                                           | 14        |
| 9          | PSA Package & Delivery Tips for COVID-19   <a href="http://www.DrJeffVW.com">www.DrJeffVW.com</a>                        | 1                                             | NIH                                   | Survival on Surfaces          | No                           | N.A.                                                                 | N.A.                                                                                                                                                         | N.A.                                                                                           | 10        |
| 11         | People are more dangerous than food! (COVID-19 food safety tips)                                                         | 2                                             | FDA                                   | Hazardous food/food packages  | No                           | N.A.                                                                 | N.A.                                                                                                                                                         | "It is conceivable, it is possible, but the experts as yet are not terribly worried about it." | 14        |
|            |                                                                                                                          |                                               | CDC                                   |                               |                              |                                                                      |                                                                                                                                                              |                                                                                                | 6         |
| 12         | How to handle your groceries during the COVID-19 outbreak                                                                | 1                                             | USDA                                  | Hazardous food/food packages  | No                           | N.A.                                                                 | N.A.                                                                                                                                                         | "You don't need to wash meat, poultry or eggs."                                                | 11        |

|    |                                                                   |   |                      |                               |      |      |      |                                                                                                                                                                                   |    |
|----|-------------------------------------------------------------------|---|----------------------|-------------------------------|------|------|------|-----------------------------------------------------------------------------------------------------------------------------------------------------------------------------------|----|
| 15 | Doctors weigh in on people cleaning groceries                     | 1 | CDC                  | Survival on Surfaces          | No   | N.A. | N.A. | N.A.                                                                                                                                                                              | 5  |
| 17 | Can You Get Coronavirus Through Food?                             | 2 | USDA                 | Hazardous food/food packages  | No   | N.A. | N.A. | "Corona beer isn't the only food or beverage item which poses zero risk of spreading this dreaded virus."                                                                         | 11 |
|    |                                                                   |   | CDC                  | Hazardous food/food packages  | No   | N.A. | N.A. | "There just isn't any risk to us from the animal products we purchase and consume." (about COVID-19)                                                                              | 6  |
| 19 | To clean or not to clean your groceries in the age of coronavirus | 5 | FDA                  | Hazardous food/food packages  | No   | N.A. | N.A. | "It is very difficult to prove a negative." (referring to the expression "There is no evidence...")                                                                               | 14 |
|    |                                                                   |   | CDC                  |                               |      |      |      |                                                                                                                                                                                   | 6  |
|    |                                                                   |   | EPA                  | Sanitizing Surfaces           | No   | N.A. | N.A. | N.A.                                                                                                                                                                              | 15 |
| 20 | COVID-19: Food Safety and Nutrition                               | 2 | USDA                 | Washing fruits and vegetables | No   | N.A. | N.A. | N.A.                                                                                                                                                                              | 13 |
|    |                                                                   |   | USDA                 | Hazardous food/food packages  | No   | N.A. | N.A. | "Normal cooking should kill the coronavirus."                                                                                                                                     | 11 |
|    |                                                                   |   | CDC                  | General Practices             | N.A. | N.A. | N.A. | "This are the people that will give you the information that you need to be safe... Don't listen to actors, politicians, your neighbor, or read something from a crazy headline." | 6  |
|    |                                                                   |   | NIH                  |                               |      |      |      |                                                                                                                                                                                   | 9  |
| 21 | Safe Grocery Shopping: U of G Expert Dispels Myths                | 2 | Government of Canada | Washing fruits and vegetables | No   | N.A. | N.A. | "The soap that you could use could actually cause vomiting and diarrhea."                                                                                                         | 7  |
|    |                                                                   |   | FDA                  |                               |      |      |      |                                                                                                                                                                                   | 13 |

|    |                                                                            |   |      |                               |     |                                                                                   |                                                                                                                                                                                                                                                                                                     |                                                                                                                                                                                                                                                                                       |      |
|----|----------------------------------------------------------------------------|---|------|-------------------------------|-----|-----------------------------------------------------------------------------------|-----------------------------------------------------------------------------------------------------------------------------------------------------------------------------------------------------------------------------------------------------------------------------------------------------|---------------------------------------------------------------------------------------------------------------------------------------------------------------------------------------------------------------------------------------------------------------------------------------|------|
| 25 | Safe Use Of Bleach And How To Sanitize Your Groceries During Coronavirus   | 2 | CDC  | Sanitizing Surfaces           | No  | N.A.                                                                              | N.A.                                                                                                                                                                                                                                                                                                | N.A.                                                                                                                                                                                                                                                                                  | 2    |
|    |                                                                            |   | CDC  | Sanitizing Surfaces           | No  | N.A.                                                                              | N.A.                                                                                                                                                                                                                                                                                                | N.A.                                                                                                                                                                                                                                                                                  | 2    |
|    |                                                                            |   | CDC  | Survival on Surfaces          | No  | N.A.                                                                              | N.A.                                                                                                                                                                                                                                                                                                | "But that apple, don't know. So out of an abundance of caution let's consider our produce contaminated with coronavirus."                                                                                                                                                             | 5    |
|    |                                                                            |   | CDC  | Survival on Surfaces          | No  | N.A.                                                                              | N.A.                                                                                                                                                                                                                                                                                                | N.A.                                                                                                                                                                                                                                                                                  | 6    |
| 27 | How to Wash Produce during COVID-19 and Beyond                             | 6 | FDA  | Hazardous food/food packages  | No  | N.A.                                                                              | N.A.                                                                                                                                                                                                                                                                                                | "So it looks pretty unlikely that you could get COVID-19 from eating coronavirus laced food. And just for the record, the whole story about Americans thinking that they can get coronavirus from drinking a Corona beer, not true; just some survey questions taken out of context." | 14   |
|    |                                                                            |   | FDA  |                               |     |                                                                                   |                                                                                                                                                                                                                                                                                                     |                                                                                                                                                                                                                                                                                       | 14   |
|    |                                                                            |   | USDA | Washing fruits and vegetables | No  | N.A.                                                                              | N.A.                                                                                                                                                                                                                                                                                                | "Pandemic or not, you should always wash your produce before eating it."                                                                                                                                                                                                              | 13   |
|    |                                                                            |   | NSF  |                               |     |                                                                                   |                                                                                                                                                                                                                                                                                                     |                                                                                                                                                                                                                                                                                       | N.A. |
| 28 | Can coronavirus (COVID-19) live on groceries? Are they safe to bring home? | 2 | FDA  | Grocery store practices       | Yes | "There is no clear guidance from either the CDC or the FDA." (groceries handling) | The FDA, in its official website, posted an article named "Shopping for Food During the COVID-19 Pandemic - Information for Consumers."<br>The CDC, in its official website, has information related to COVID-19 and Food Safety. They also refer to the FDA official website for more information. | "So I'm just gonna give you my personal practical opinion. When you are in public assume that every surface you touch, is potentially contaminated."                                                                                                                                  | 14   |
|    |                                                                            |   | CDC  |                               |     |                                                                                   |                                                                                                                                                                                                                                                                                                     |                                                                                                                                                                                                                                                                                       |      |



|    |                                                                                 |   |                      |                               |    |      |      |                                                                                                          |      |
|----|---------------------------------------------------------------------------------|---|----------------------|-------------------------------|----|------|------|----------------------------------------------------------------------------------------------------------|------|
| 31 | 10 Ways the Fast Food Industry is AFFECTED by the Coronavirus                   | 2 | CDC                  | Handwashing                   | No | N.A. | N.A. | "Thankfully COVID-19 is nothing like the plague, but it still requires us to be vigilant about hygiene." | 4    |
|    |                                                                                 |   | FDA                  | Hazardous food/food packages  | No | N.A. | N.A. | N.A.                                                                                                     | 14   |
| 33 | 12 Tips for Grocery Shopping During the Pandemic.                               | 1 | FDA                  | Grocery store practices       | No | N.A. | N.A. | Video from the FDA.                                                                                      | N.A. |
| 34 | DDP talks Food Safety in your home.                                             | 1 | CDC                  | Handwashing                   | No | N.A. | N.A. | N.A.                                                                                                     | 4    |
| 38 | PSA Covid19: Safe Grocery Shopping with a Grocery Store CEO                     | 1 | CDC                  | Sanitizing Surfaces           | No | N.A. | N.A. | N.A.                                                                                                     | 1    |
|    |                                                                                 |   | Government of Canada | Handwashing                   | No | N.A. | N.A. | N.A.                                                                                                     | 7    |
| 39 | What to eat in isolation   COVID-19 Ask an expert                               | 6 | Government of Canada | Sanitizing Surfaces           | No | N.A. | N.A. | N.A.                                                                                                     | 8    |
|    |                                                                                 |   | Government of Canada | Sanitizing Surfaces           | No | N.A. | N.A. | N.A.                                                                                                     | 8    |
|    |                                                                                 |   | Government of Canada | Sanitizing Surfaces           | No | N.A. | N.A. | N.A.                                                                                                     | 8    |
|    |                                                                                 |   | Government of Canada | Grocery store practices       | No | N.A. | N.A. | N.A.                                                                                                     | 8    |
|    |                                                                                 |   | Government of Canada | Washing fruits and vegetables | No | N.A. | N.A. | N.A.                                                                                                     | 7    |
| 43 | What You Need to Know: Food and COVID-19                                        | 1 | FDA                  | Hazardous food/food packages  | No | N.A. | N.A. | Video from the FDA.                                                                                      | N.A. |
| 45 | Inside America's Food Supply Chain Under Covid-19   Forbes                      | 1 | USDA                 | Hazardous food/food packages  | No | N.A. | N.A. | "The chain is at risk, because its workers are at risk."                                                 | 12   |
| 50 | HOW TO CLEAN YOUR GROCERIES FROM COVID-19   Grocery Shopping Coronavirus Safety | 1 | CDC                  | Sanitizing Surfaces           | No | N.A. | N.A. | N.A.                                                                                                     | 3    |
| 51 | Doctor ER Covid-19 food safety tips   Quarantine Cooking Show                   | 2 | FDA                  | Hazardous food/food packages  | No | N.A. | N.A. | N.A.                                                                                                     | 14   |

|    |                                                                                                      |   |      |                               |     |                                                              |                                                                                                                                                                                        |                                                                                                                                                                                                                                          |    |
|----|------------------------------------------------------------------------------------------------------|---|------|-------------------------------|-----|--------------------------------------------------------------|----------------------------------------------------------------------------------------------------------------------------------------------------------------------------------------|------------------------------------------------------------------------------------------------------------------------------------------------------------------------------------------------------------------------------------------|----|
|    |                                                                                                      |   | FDA  | Washing fruits and vegetables | No  | N.A.                                                         | N.A.                                                                                                                                                                                   | "If you want to do more than that, you can rinse or spray your fresh produce with a solution that is three parts water and one part vinegar. If you're really concerned about fresh produce, only buy kind that you would peel or cook." | 14 |
|    |                                                                                                      |   | CDC  | Handwashing                   | No  | N.A.                                                         | N.A.                                                                                                                                                                                   | N.A.                                                                                                                                                                                                                                     | 4  |
|    |                                                                                                      |   | CDC  | Sanitizing Surfaces           | No  | N.A.                                                         | N.A.                                                                                                                                                                                   | N.A.                                                                                                                                                                                                                                     | 3  |
| 58 | CDC offers tips to be safe from COVID-19 when you shop for groceries                                 | 4 | CDC  | Grocery store practices       | No  | N.A.                                                         | N.A.                                                                                                                                                                                   | N.A.                                                                                                                                                                                                                                     | 6  |
|    |                                                                                                      |   | CDC  | Grocery store practices       | Yes | Safety tips for shopping: Throw out plastic bags, cardboard. | Although the CDC posted to discard packaged food after a disaster (like containers that have touched flood waters), it was not suggested as a tip to reduce the incidence of COVID-19. | N.A.                                                                                                                                                                                                                                     | 6  |
|    |                                                                                                      |   | CDC  | Hazardous food/food packages  | No  | N.A.                                                         | N.A.                                                                                                                                                                                   | N.A.                                                                                                                                                                                                                                     | 6  |
| 66 | Is food delivery safe? Does cooking kill the coronavirus? An expert answers commonly asked questions | 4 | FDA  | Hazardous food/food packages  | No  | N.A.                                                         | N.A.                                                                                                                                                                                   | N.A.                                                                                                                                                                                                                                     | 14 |
|    |                                                                                                      |   | FDA  | General Practices             | No  | N.A.                                                         | N.A.                                                                                                                                                                                   | "I strongly urge consumers to use good food safety practices at this time."                                                                                                                                                              | 14 |
|    |                                                                                                      |   | USDA | General Practices             |     |                                                              |                                                                                                                                                                                        |                                                                                                                                                                                                                                          | 11 |
| 72 | Does Cooking & Freezing Food Affect the Coronavirus?                                                 | 1 | EPA  | Sanitizing Surfaces           | No  | N.A.                                                         | N.A.                                                                                                                                                                                   | N.A.                                                                                                                                                                                                                                     | 15 |
| 75 | Food Safety During the COVID-19 Outbreak                                                             | 3 | CDC  | Hazardous food/food packages  | No  | N.A.                                                         | N.A.                                                                                                                                                                                   | "It's not a gastrointestinal disease, so a person cannot get sick by ingesting food that may be contaminated with COVID-19."                                                                                                             | 6  |

---

|    |                                                                          |   |      |                              |    |      |      |                                                                                          |    |
|----|--------------------------------------------------------------------------|---|------|------------------------------|----|------|------|------------------------------------------------------------------------------------------|----|
|    |                                                                          |   | USDA |                              |    |      |      |                                                                                          | 11 |
|    |                                                                          |   | FDA  |                              |    |      |      |                                                                                          | 14 |
| 79 | Is grocery store food, take-out food safe to eat?                        | 1 | CDC  | Hazardous food/food packages | No | N.A. | N.A. | N.A.                                                                                     | 6  |
| 82 | Coronavirus food safety tips for takeout and delivery                    | 2 | FDA  | Hazardous food/food packages | No | N.A. | N.A. | "That's great news for New Mexicans who want to keep our local restaurants in business." | 14 |
|    |                                                                          |   | FDA  | Hazardous food/food packages | No | N.A. | N.A. | N.A.                                                                                     | 14 |
| 84 | Coronavirus, Food Packaging, and Ways to Prevent the Spread of COVID-19  | 2 | CDC  | Hazardous food/food packages | No | N.A. | N.A. | N.A.                                                                                     | 6  |
|    |                                                                          |   | USDA |                              |    |      |      |                                                                                          | 11 |
| 85 | More than 800 cases of COVID-19 at 19 NC food and meat processing plants | 2 | CDC  | Hazardous food/food packages | No | N.A. | N.A. | N.A.                                                                                     | 6  |
|    |                                                                          |   | USDA |                              |    |      |      |                                                                                          | 11 |

---

<sup>a</sup> The criteria for miscitation information are based on current available information from Government Agencies and was checked by the reviewers.

<sup>b</sup> This section is filled if there was a miscitation in the video. It describes the miscitation in the video.

<sup>c</sup> Not applicable

### Reference list of Supplement Table 5

1. Centers for Disease Control and Prevention. 2020. Cleaning and disinfecting your facility. Available at: <https://www.cdc.gov/coronavirus/2019-ncov/community/disinfecting-building-facility.html>. Accessed 17 August 2020.
2. Centers for Disease Control and Prevention. 2020. Cleaning and disinfecting your home. Available at: <https://www.cdc.gov/coronavirus/2019-ncov/prevent-getting-sick/cleaning-disinfection.html>. Accessed 28 July 2020.
3. Centers for Disease Control and Prevention. 2020. Cleaning and sanitizing with bleach after an emergency. Available at: <https://www.cdc.gov/disasters/bleach.html>. Accessed 17 August 2020.
4. Centers for Disease Control and Prevention. 2020. Handwashing. Available at: <https://www.cdc.gov/coronavirus/2019-ncov/global-covid-19/handwashing.html>. Accessed 28 July 2020.
5. Centers for Disease Control and Prevention. 2020. Public health responses to COVID-19 outbreaks on cruise ships – worldwide, February – March 2020. Available at: <https://www.cdc.gov/mmwr/volumes/69/wr/pdfs/mm6912e3-H.pdf>. Accessed 28 July 2020.
6. Centers for Disease control and Prevention. 2020. Running essential errands. Available at: <https://www.cdc.gov/coronavirus/2019-ncov/daily-life-coping/essential-goods-services.html>. Accessed 17 August 2020.

7. Government of Canada. 2020. Coronavirus disease (COVID-19) and food safety. Available at: <https://www.canada.ca/en/health-canada/services/food-nutrition/food-safety/covid19.html>. Accessed 17 August 2020.
8. Government of Canada. 2020. Food safety and you. Available at: <https://www.canada.ca/en/health-canada/services/general-food-safety-tips/food-safety-you.html>. Accessed 17 August 2020.
9. National Institutes of Health. 2019. Healthy eating, food safety. Available at: <https://www.nia.nih.gov/health/food-safety>. Accessed 17 August 2020.
10. National Institutes of Health. 2020. Study suggests new coronavirus may remain on surfaces for days. Available at: <https://www.nih.gov/news-events/nih-research-matters/study-suggests-new-coronavirus-may-remain-surfaces-days>. Accessed 02 August 2020.
11. U.S. Department of Agriculture. 2020. Food supply chain. Available at <https://www.usda.gov/coronavirus/food-supply-chain>. Accessed 17 August 2020.
12. U.S. Department of Agriculture. 2020. USDA, FDA strengthen U.S. food supply chain protection during COVID-19 Pandemic. Available at: <https://www.usda.gov/media/press-releases/2020/05/19/usda-fda-strengthen-us-food-supply-chain-protections-during-covid>. Accessed 17 August 2020.
13. U.S. Department of Agriculture. 2020. Washing food: does it promote food safety? Available at: <https://www.fsis.usda.gov/food-safety/safe-food-handling-and-preparation/food-safety-basics/washing-food-does-it-promote-food>. Accessed 31 July 2020.

14. U.S. Food and Drug Administration. 2020. Shopping for food during the COVID-19 Pandemic – Information for Consumers. Available at: <https://www.fda.gov/food/food-safety-during-emergencies/shopping-food-during-covid-19-pandemic-information-consumers>. Accessed 17 August 2020.
15. United States Environmental Protection Agency. 2020. Selected EPA-Registered disinfectants. Available at: <https://www.epa.gov/pesticide-registration/selected-epa-registered-disinfectants>. Accessed 17 August 2020.
